# Supplementary material
Source: HighWire-hosted journal article supplement (https://www.cmaj.ca/content/suppl/2017/02/22/189.8.E295)
Supplement: 161082-res-3-at.pdf [file 161082-res-3-at.pdf]

**Appendix 3 (as supplied by the authors): Generic drug prices in Canada and comparators, essential medicines with one or more generic equivalent in comparator countries, May-July 2016, Canadian dollars**

| Medication                  | Dosage form     | CAN Source | CAN price | NZ price | USA price | SWE price |
|-----------------------------|-----------------|------------|-----------|----------|-----------|-----------|
| Doxycycline                 | TAB-100MG       | SK         | \$0.586   | \$0.023  | \$0.422   | \$0.526   |
| Ranitidine                  | TAB-150MG       | ON         | \$0.180   | \$0.018  | \$0.028   |           |
| Pantoprazole                | EC TAB-40MG     | ON         | \$0.363   | \$0.031  |           | \$0.103   |
| Domperidone                 | TAB-10MG        | ON         | \$0.059   | \$0.028  |           |           |
| Senna                       | TAB-8.6MG       | BC         | \$0.050   | \$0.019  | \$0.008   |           |
| Sulfasalazine               | EC TAB-500MG    | ON         | \$0.282   |          | \$0.098   | \$0.164   |
| Metformin                   | TAB-500MG       | ON         | \$0.044   | \$0.008  |           | \$0.036   |
| Gliclazide                  | TAB-80MG        | ON         | \$0.093   | \$0.020  |           |           |
| Thiamine                    | TAB-50MG        | SK         | \$0.070   | \$0.048  | \$0.009   |           |
| Warfarin                    | TAB-2MG         | ON         | \$0.084   | \$0.074  | \$0.053   |           |
| Clopidogrel                 | TAB-75MG        | ON         | \$0.474   | \$0.056  | \$0.106   | \$0.088   |
| Vitamin b12                 | VIAL-1MG/ML     | BC         | \$0.331   |          | \$0.553   |           |
| Folic acid                  | TAB-5MG         | ON         | \$0.026   | \$0.019  |           |           |
| Amiodarone                  | TAB-200MG       | ON         | \$0.515   | \$0.329  | \$0.241   |           |
| Chlorthalidone              | TAB-50MG        | ON         | \$0.124   |          | \$0.184   |           |
| Furosemide                  | TAB-40MG        | ON         | \$0.075   | \$0.007  | \$0.006   | \$0.035   |
| Spironolactone              | TAB-25MG        | ON         | \$0.106   | \$0.031  | \$0.025   | \$0.100   |
| Amlodipine                  | TAB-5MG         | ON         | \$0.242   | \$0.017  | \$0.012   | \$0.069   |
| Diltiazem                   | 240mg LA Cap    | ON         | \$0.640   | \$0.110  | \$0.461   |           |
| Ramipril                    | CAP-2.5MG       | ON         | \$0.147   |          | \$0.050   | \$0.086   |
| Candesartan                 | TAB-4MG         | ON         | \$0.170   | \$0.024  | \$0.967   | \$0.067   |
| Pravastatin                 | TAB-20MG        | ON         | \$0.478   | \$0.099  | \$0.244   | \$0.129   |
| Atorvastatin                | FC TAB-20MG     | ON         | \$0.392   | \$0.040  | \$0.047   | \$0.074   |
| Nystatin                    | OSUSP-100K/ML   | BC         | \$0.056   | \$0.092  | \$0.260   | \$0.389   |
| Hydrocortisone              | CREAM-1%        | SK         | \$0.172   | \$0.024  | \$0.039   |           |
| Betamethasone               | CREAM-0.05%     | BC         | \$0.221   | \$0.170  | \$1.085   |           |
| Medroxyprogesterone         | INJ-150MG/ML    | BC         | \$31.702  | \$6.032  | \$29.333  |           |
| Tamsulosin                  | CAP-400MCG      | ON         | \$0.150   | \$0.116  | \$0.122   |           |
| Finasteride                 | TAB-5MG         | ON         | \$0.463   | \$0.060  | \$0.129   | \$0.130   |
| Dexamethasone               | TAB-4MG         | ON         | \$0.305   | \$0.053  | \$0.123   |           |
| Prednisone                  | TAB-5MG         | ON         | \$0.022   | \$0.019  | \$0.090   |           |
| Amoxicillin                 | CAP-250MG       | ON         | \$0.175   | \$0.026  | \$0.020   |           |
| Cloxacillin                 | CAP-500MG       | ON         | \$0.449   | \$0.108  |           |           |
| Amoxicillin/clavulanic acid | 500mg/125mg Tab | ON         | \$0.667   | \$0.084  | \$0.079   | \$0.407   |
| Cephalexin                  | CAP-250MG       | ON         | \$0.370   |          | \$0.163   |           |
| Azithromycin                | TAB-250MG       | ON         | \$1.307   | \$0.259  | \$0.403   | \$1.120   |
| Ciprofloxacin               | TAB-500MG       | ON         | \$0.698   | \$0.062  |           | \$0.421   |
| Levofloxacin                | TAB-500MG       | ON         | \$1.372   |          | \$0.130   | \$3.701   |
| Metronidazole               | TAB-250MG       | ON         | \$0.060   |          | \$0.024   |           |
| Fluconazole                 | CAP-150MG       | ON         | \$3.942   | \$0.612  |           | \$1.645   |
| Valacyclovir                | TAB-500MG       | ON         | \$0.848   |          | \$0.313   |           |
| Azathioprine                | TAB-50MG        | ON         | \$0.241   | \$0.114  | \$0.096   |           |
| Methotrexate                | TAB-2.5MG       | ON         | \$0.633   | \$0.091  | \$1.842   | \$0.138   |
| Ibuprofen                   | TAB-200MG       | ON         | \$0.051   | \$0.008  | \$0.012   | \$0.112   |
| Naproxen                    | TAB-250MG       | ON         | \$0.107   | \$0.031  | \$0.028   | \$0.115   |
| Baclofen                    | TAB-10MG        | ON         | \$0.160   | \$0.033  | \$0.106   |           |

|                    |                |    |         |         |         |         |
|--------------------|----------------|----|---------|---------|---------|---------|
| Allopurinol        | Tab-100MG      | ON | \$0.078 | \$0.013 | \$0.260 | \$0.310 |
| Alendronate        | Tab-10MG       | ON | \$0.499 |         | \$0.141 | \$0.596 |
| Hydromorphone      | TAB-4MG        | ON | \$0.224 |         | \$0.078 |         |
| Carbamazepine      | TAB-200MG      | ON | \$0.232 | \$0.125 | \$0.035 |         |
| Valproic acid      | CAP-250MG      | ON | \$0.137 |         | \$0.144 |         |
| Benzotropine       | TAB-2MG        | ON | \$0.046 | \$0.115 | \$0.020 |         |
| Haloperidol        | TAB-0.5MG      | ON | \$0.122 | \$0.054 | \$0.023 |         |
| Clozapine          | TAB-25MG       | SK | \$0.659 | \$0.098 | \$0.223 | \$0.208 |
| Lithium            | CAP-300MG      | ON | \$0.066 |         | \$0.025 |         |
| Risperidone        | TAB-3MG        | ON | \$0.911 | \$0.037 | \$0.049 | \$0.175 |
| Diazepam           | TAB-2MG        | ON | \$0.051 | \$0.020 | \$0.018 |         |
| Fluoxetine         | CAP-20MG       | ON | \$0.460 | \$0.017 | \$0.018 | \$0.146 |
| Donepezil          | TAB-10MG       | ON | \$0.826 | \$0.101 | \$0.056 | \$0.068 |
| Naltrexone         | TAB-50MG       | BC | \$5.258 | \$2.183 | \$1.081 | \$1.362 |
| Hydroxychloroquine | TAB-200MG      | ON | \$0.158 | \$0.090 | \$0.622 |         |
| Salbutamol         | 100mcg/MDI-200 | ON | \$0.025 | \$0.016 |         |         |
| Latanoprost        | SOL-0.005%     | ON | \$3.833 | \$0.517 | \$1.057 |         |

Note: prices listed above were converted to Canadian currency using five-year average exchange rates.
